# Supplementary material for: Modulation of the p75 neurotrophin receptor suppresses age-related basal forebrain cholinergic neuron degeneration
Source: PubMed Central journal article supplement (PMC6437186; doi:10.1038/s41598-019-41654-8), 2019-03-27

# **Modulation of the p75 neurotrophin receptor suppresses age-related basal forebrain cholinergic neuron degeneration**

Youmei Xie, Rick B. Meeker, Stephen M. Massa, Frank M. Longo

Fig S1.

Full length western blot scans utilized in Fig 9.

First: Synaptophysin

Second: actin

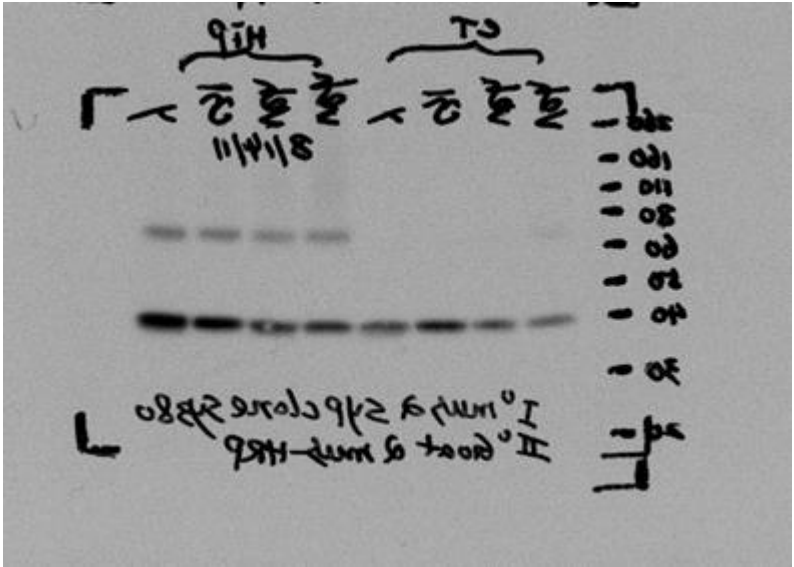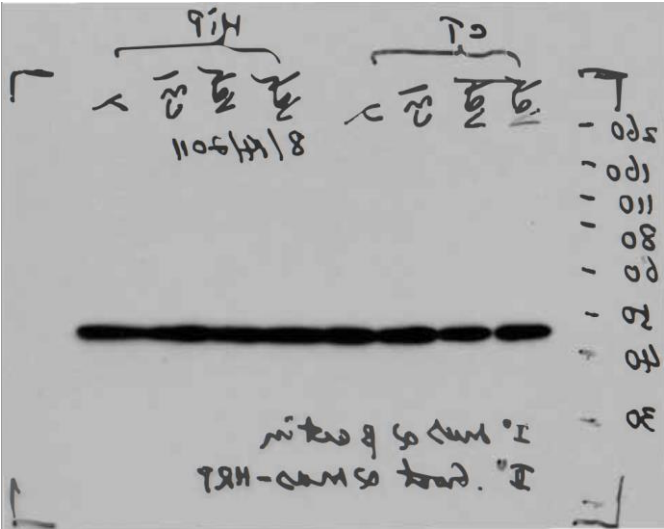

Supplement: 41598_2019_41654_MOESM1_ESM.pdf [file 41598_2019_41654_MOESM1_ESM.pdf]
